# Supplementary material for: Identification of Candidate Carboxylesterases Associated With Odorant Degradation in Holotrichia parallela Antennae Based on Transcriptome Analysis
Source: Front Physiol. 2021 Sep 10;12:674023. doi: 10.3389/fphys.2021.674023 (PMC8461172; doi:10.3389/fphys.2021.674023)
Supplement: Supplementary file 2 [file Table_2.XLSX]

## Sheet: Sheet1
Supplementary Table 2 Genbank access numbers of other insect species used for sequence alignments and constructing phylogenetic trees
CXE name	Acc.No. of CXEs
DmelaE1	AAF54002.3
DmelaE2	AAF54003.2
DmelaE5	AAF54006.3
DmelaE8	AAF54012.2
Dmelcricklet	AAF46738.1
DmelJhe	AAF58061.3
DmelJhedup	AAF58062.2
DmelEst6	AAF49946.1
DmelEst7	AAF49945.1
DmelAChE	AAF54915.1
DmelGliotactin	AAF53482.2
DmelNeurotactin	AAF49416.1
Dmelneuroligin	NP_523496.1
Bmorcce-1	BAI66477.1
BmorCCE-4a	BAI94515.1
BmorCCE-6	BAJ11978.1
BmorCCE-5as1	BAI94517.1
BmorCCE3	BAI66479.1
Bmorace1	BAF33337.1
Bmorjhe	AAR37335.1
Bmorae18	AGG20206.1
BmorCCE014a	ABF51449.1
BmorCCEae13	ABD36195.1
BmorCCE014b	EF017799
BmorCCE028a	BGIBMGA005805
BmorCCE032a	BGIBMGA001242
BmorCCE024a	ABY57298.1
BmorCCE026a	BGIBMGA009874
BmorCCE020b	BGIBMGA000775
BmorCCE018a	DQ311250
BmorCCE016a	BGIBMGA010988
BmorCCE030b	BGIBMGA006082
BmorCCE016c	BGIBMGA010976
BmorCCE016d	BGIBMGA010986
SlitCXE7	ACV60234.1
SlitCXE8	ACV60235.1
SlitCXE3	ACV60230.1
SlitCXE11	ACV60238.1
SlitCXE5	ACV60232.1
SlitCXE13	ACV60240.1
SlitCXE15	ACV60242.1
SlitCXE2	ACV60229.1
SlitCXE10	ACV60237.1
SlitCXE16	ACV60243.1
SlitCXE17	ACV60244.1
Slit-EST	ABH01081.1
AgamAce	CAD32684.2
AgamCOEJHE1F	EAA11940.3
AgamCOEJHE3F	EAU76510.1
AgamCOEAE8O	EAA11381.4
AgamAChE2	CAD29866.1
AgamCOEAE2E	EAU76494.1
AgamCOEAE1A	EAA01826.2
AgamCOEBE1D	EAU76436.1
AgamCOEBE2D	EAA11835.4
Tcasjhe-a	BAJ10675.1
TcasEst-6	EFA11999.1
Tcasest1	CAH59956.1
Tcasest2	CAH64511.1
Tcasest3	CAH64517.1
TcasGliotactin	EFA11585.1
TcasAChE2	ADU33190.1
TcasAChE1	ADU33189.1
TcasNeuroligin-1-like	KYB27421.1
TcasNeuroligin-3-like	KYB27545.1
Amelneuroligin-3	NP_001139208.1
Amelneuroligin-5	NP_001139211.1
SlituCXE13	ADR64697.1
ApolIE	AAM14416.1
ApolPDE	AAX58711
ApolODE	AAM14415
PjapPDE	AAX58713
SnonEST	DQ680829
SexiCXE13	HQ116560
SexiCXE14	JF728803
SexiCXE4	KC493657
SexiCXE5	ADR64702.1
SexiCXE10	AEJ38207.1
