# Supplementary material for: Identification of Candidate Carboxylesterases Associated With Odorant Degradation in Holotrichia parallela Antennae Based on Transcriptome Analysis
Source: Front Physiol. 2021 Sep 10;12:674023. doi: 10.3389/fphys.2021.674023 (PMC8461172; doi:10.3389/fphys.2021.674023)
Supplement: Supplementary file 4 [file Table_4.XLSX]

## Sheet: HparCXEs
Supplementary Table 4. The 2^(-△△Ct)(quantity) data for qRT-PCR analysis
		Female		Male
		MEAN	SE	MEAN	SE
CXE1	Antenna	1.08046	0.079971	1.20392	0.103559
	Head	0	0	1.62793	0.167732
	Thorax	0	0	0	0
	Abdomen	0	0	0	0
	Leg	2.16277	0.079164	4.38242	0.186345
	Wing	1.39546	0.154716	5.69405	0.162932
CXE2	Antenna	0.951168	0.117694	1.13847	0.190125
	Head	0.2542	0.02962	0.050632	0.012289
	Thorax	0.366015	0.299431	0.119457	0.044945
	Abdomen	0.1387	0.004022	0.249941	0.065069
	Leg	0.577649	0.128307	0.295638	0.023331
	Wing	0.970788	0.258682	0.153871	0.005646
CXE3	Antenna	1.22136	0.117067	1.06946	0.036516
	Head	6.43298	0.904921	1.7737	0.405398
	Thorax	0.662202	0.04705	1.07004	0.46916
	Abdomen	0.49998	0.190054	0.131649	0.000716
	Leg	9.06422	2.14658	3.3162	0.593586
	Wing	9.14138	2.98744	4.9813	0.770158
CXE4	Antenna	0.932062	0.04221	1.07327	0.07461
	Head	0.062085	0.002986	0.006424	0.000234
	Thorax	0.020434	0.001414	0.001976	0.000496
	Abdomen	0.052582	0.009463	0.003497	0.000314
	Leg	0.037109	0.002086	0.035085	0.003063
	Wing	0.028536	0.002257	0.063338	0.006098
CXE5	Antenna	0.92677	0.048612	1.34495	0.22962
	Head	0.096688	0.005656	0.290485	0.053689
	Thorax	0.0282	0.007663	0.061764	0.016576
	Abdomen	0.446059	0.000509	0.153231	0.041891
	Leg	1.46551	0.223861	3.11946	0.280293
	Wing	0.858278	0.250893	0.910208	0.047486
CXE6	Antenna	0.479969	0.033363	0.840846	0.081604
	Head	0.328822	0.036433	1.96572	0.320649
	Thorax	1.02869	0.111013	0.190871	0.032905
	Abdomen	0.707686	0.076523	0.071568	0.000335
	Leg	4.07805	0.159768	4.00263	0.271135
	Wing	0.939425	0.06808	1.1704	0.054057
CXE7	Antenna	1.29316	0.184546	0.787056	0.068294
	Head	2.02277	0.427385	0.348109	0.075901
	Thorax	0	0	0	0
	Abdomen	0	0	0	0
	Leg	1.69951	0.512145	11.5068	2.82637
	Wing	1.86308	0.299029	4.96218	0.446455
CXE8	Antenna	1.33764	0.102802	1.0678	0.045753
	Head	132.615	17.7776	90.1978	16.4347
	Thorax	0	0	0	0
	Abdomen	0	0	0	0
	Leg	36.8464	1.43507	30.3798	3.26669
	Wing	339.18	20.8426	415.481	6.00278
CXE9	Antenna	1.03529	0.018721	1.21673	0.021911
	Head	26.4535	2.43716	5.19315	0.276262
	Thorax	0.21497	0.023351	0	0
	Abdomen	0	0	0	0
	Leg	0.440675	0.0709	1.18903	0.016154
	Wing	0.423023	0.03419	0.443602	0.003745
CXE10	Antenna	0.250055	0.012992	1.17264	0.226917
	Head	0.200174	0.027768	0.467126	0.122182
	Thorax	0.109584	0.022392	0.120292	0.038225
	Abdomen	0	0	0.038589	0.007591
	Leg	1.55563	0.028622	1.61795	0.259055
	Wing	2.16384	0.011793	2.55087	0.184254
CXE11	Antenna	0.327004	0.079954	0.81154	0.119991
	Head	0.045708	0.01598	0.128615	0.019769
	Thorax	0.003734	0.00046	0.019402	0.001598
	Abdomen	0.178465	0.019194	0.108125	0.011013
	Leg	0.150245	0.010559	0.132053	0.037033
	Wing	0.088811	0.020172	0.103252	0.01266
CXE12	Antenna	1.01364	0.023449	1.05706	0.045792
	Head	1.42502	0.123127	1.4802	0.163348
	Thorax	0	0	0	0
	Abdomen	0	0	0	0
	Leg	2.85193	0.099721	2.60427	0.118007
	Wing	4.83321	0.078634	4.69627	0.118746
CXE13	Antenna	0.370972	0.099641	0.966629	0.091464
	Head	1.02842	0.056584	4.53098	0.714268
	Thorax	0.021738	0.015074	0	0
	Abdomen	0.150231	0.08057	0.041373	0.005563
	Leg	6.59193	0.139119	2.84335	0.806471
	Wing	1.19346	0.071145	1.48627	0.203865
CXE14	Antenna	1.74303	0.151182	1.19366	0.241724
	Head	1.54532	0.104637	3.27658	0.338067
	Thorax	2.32403	0.349294	0.990426	0.346966
	Abdomen	1.42555	0.259547	0.403975	0.004596
	Leg	3.42586	0.315395	6.36875	0.451865
	Wing	0.635818	0.119282	0.923114	0.129253
CXE15	Antenna	1.21711	0.217447	0.987717	0.114884
	Head	1.11633	0.27547	0.163808	0.011141
	Thorax	0	0	0	0
	Abdomen	0	0	0	0
	Leg	2.56405	0.426394	3.20294	0.186173
	Wing	1.34585	0.154544	1.17069	0.039125
CXE16	Antenna	0.748378	0.087508	1.06507	0.057251
	Head	0.018585	0.006474	0.146313	0.008202
	Thorax	0.007895	0.001992	0.023761	0.003327
	Abdomen	0.260661	0.040611	0.096322	0.011723
	Leg	0.051788	0.005151	0.043257	0.004738
	Wing	0.367507	0.015894	0.143925	0.003336
CXE17	Antenna	0.782074	0.10902	1.14857	0.387674
	Head	0.050377	0.013149	0.007019	0.003838
	Thorax	0.020519	0.001404	0	0
	Abdomen	0	0	0	0
	Leg	0.005674	0.000748	0.013227	0.002191
	Wing	0.031261	0.012746	0.089742	0.004041
CXE18	Antenna	3.99442	0.185021	1.75446	0.432132
	Head	0.266493	0.028893	0.068492	0.008664
	Thorax	0.013038	0.000704	0.02518	0.000849
	Abdomen	0.031882	0.006923	0.010006	0.000286
	Leg	1.16093	0.114098	0.671683	0.115483
	Wing	1.51533	0.015144	0.620469	0.07332
CXE19	Antenna	1.47155	0.28464	1.00726	0.188375
	Head	0.053252	0.012953	0.025404	0.001131
	Thorax	0.102463	0.022048	0.162253	0.008168
	Abdomen	0.007584	0.000583	0.006244	0.000272
	Leg	0.041993	0.006292	0.051025	0.002839
	Wing	0.051834	0.002022	0.023319	0.001696
CXE20	Antenna	1.01923	0.045611	0.98334	0.05631
	Head	0.026989	0.007175	0.028152	0.00934
	Thorax	0	0	0	0
	Abdomen	0.192166	0.010925	0.016618	0.001629
	Leg	0.124167	0.019699	0.175763	0.038195
	Wing	0.204733	0.055851	0.158326	0.01159
